# Supplementary material
Source: HighWire-hosted journal article supplement (https://bmjopen.bmj.com/content/7/5/e014995)
Supplement: inline-supplementary-material-1 [file inline-supplementary-material-1.pdf]

## APPENDIX 1

### Search Strategy for MEDLINE (Ovid) 1946- 27/10/2016

N.B.: Set 1 is based on Ayegbusi, Kyte, Cockwell et al. (2016)<sup>1</sup>; Sets 2-6 are based on the Oxford PROM filter<sup>2</sup>

[mp = title, abstract, original title, name of substance word, subject heading word, keyword heading word, protocol supplementary concept word, rare disease supplementary concept word, unique identifier]

1. (PRO integration or Clinical PRO application\* or telePRO or automated PRO algorithm\* or screening purpose\* or PRO questionnaire\* or Patient-reported outcome questionnaire\* or Patient-reported symptom\* or Patient-centred care or Patient self report\* or Self-report health or Self-rated health or Self-reported measure\* of health or Health outcome\* or Health communication\* or Hospital performance evaluation\* or Automated telephone survey system\* or paper-based survey\* or web-based survey\* or web-based PRO platform\* or web-based system\* or PRO collection\* or PRO measure\* or PRO intervention\* or PRO assessment intervention\* or PRO data or PRO assessment\* or Routine PRO assessment\* or Routine PRO collection or Symptom assessment\* or Symptom monitoring or Symptom data or Functional status or Electronic PRO assessment\* or Electronic PRO system\* or ePRO or ePRO\* or ePRO system\* or PRO system\* or Generic PRO system\* or PRO-based clinical alert system\*).mp.
2. (HR-PRO or HRPRO or HRQL or HRQoL or QL or QoL).mp.
3. (health index\* or health indices or health profile\*).mp.
4. health status.mp.
5. ((patient or self or child or parent or carer or proxy) adj (appraisal\* or appraised or report or reported or reporting or rated or rating or based or assessed or assessment\*)).mp.
6. ((disability or function or functional or functions or subjective or utility or utilities or wellbeing or well being) adj2 (index or indices or instrument or instruments or measure or measures or questionnaire\* or profile of profiles or scale or scales or score or scores or status or survey or surveys)).mp.
7. Surveys.mp. and Questionnaires/
8. Rating Scale\*.mp.
9. Visual Analogue Scale\*.mp.
10. Self Report.mp.
11. ((Speech Spatial and Qualities of Hearing Scale) or SSQ).mp.
12. BORG-CR10.mp.
13. ((NASA-Task Load Index) or NASA-TLX).mp.
14. ((Hearing Implant Sound Quality Index) or HISQUI).mp.
15. (Device Oriented Subjective Outcome or DOSO).mp.
16. ((International Outcome Inventory for Hearing Aids) or IOI-HA).mp.
17. Social Hearing Handicap Index.mp.
18. (Multidimensional Fatigue Inventory or MFI).mp.
19. (Glasgow Benefit Inventory or GBI).mp.
20. (Nijmegen Cochlear Implant Questionnaire or NCIQ).mp.
21. (Abbreviated Profile of Hearing Aid Benefit or APHAB).mp.
22. (Questionnaire on the Experience and Evaluation of Work or QEEW).mp.
23. exp Hearing disorders/
24. exp Cochlear Implants/ or Cochlear Implantation/ or cochlear implant\*.mp
25. exp Hearing aids/

## Listening Effort PROMs: Systematic Review Protocol

26. (hearing adj3 fatigu\*).mp.
27. (listening adj4 fatigu\*).mp.
28. (listening adj4 ease).mp.
29. (listening adj4 effort\*).mp.
30. (hearing adj3 effort\*).mp.
31. (attention adj4 listening).mp.
32. (attention adj3 hearing).mp.
33. exp Mental Fatigue/
34. (perceiv\* adj4 effort\*).mp.
35. (subject\* adj4 effort\*).mp.
36. 1 or 2 or ..... or 22
37. 23 or 24 or 25
38. 26 or 27 or 28 .....or 35
39. 36 and 37
40. 39 or 38

### **REFERENCES**

1. Aiyegbusi OL, Kyte D, Cockwell P, et al. Measurement properties of patient-reported outcome measures (PROMs) used in adult patients with chronic kidney disease: a systematic review protocol. *BMJ Open* 2016;6(10) doi: 10.1136/bmjopen-2016-012014
2. MacIntosh A, Casañas i Comabella C, Hadi M, et al. PROM Group Construct & Instrument Type Filters 2010 [http://www.cosmin.nl/images/upload/files/PROM\\_Gp\\_filtersOCTOBER\\_2010FINAL.pdf](http://www.cosmin.nl/images/upload/files/PROM_Gp_filtersOCTOBER_2010FINAL.pdf) (accessed October 2016).
